# Supplementary material
Source: MDPI journal article supplement (https://www.mdpi.com/2072-4292/15/11/2826)
Supplement: s1 [file s1]

The stem and branch metrics were derived based on the construction of 3D tree model. Tables S1–S4 list the detail definition and format of stem, branch, entire tree and crown metrics. The DBH was calculated as the diameter of the circle fitted to stem points at the tree height (TH) between 1.3m and 1.4 m using the least square algorithm (Figure S1). Tree height was the height difference between the highest and lowest points of individual trees. The minimum stem radius was the radius of fitted circle at the crown start height using the same fitting method of DBH. Tree volume was calculated using the alpha shape algorithm (Colaço et al., 2017; Di Gennaro and Matese, 2020). Stem radial irregularity S5 was the standard deviation of the distance  $\Delta s$  between points and projected circle. Stem taper S6 was the taper of stem from crown start height and tree root.

The branch metrics were derived based on the construction of a 3D tree model TreeQSM generated by fitting cylinders to branch points. Branch length, radius, and volume were extracted from 3D cylinders. The angle between branch and stem or between different order branches was calculated through the centreline of 3D cylinder models. The distance between branches was calculated as the vertical distance between the start points of branches.

Some entire tree metrics were derived based on gridding tree point cloud with edge length of 0.1 m referring to the work of Lin and Hyypä (2016). The grid height was the height of grid center. To T4, the coverage area was calculated as the project area that projecting tree points on the x-y plane. The volume of point clouds was calculated by the convex hull algorithm (Cupec et al, 2020). The convex hull of a point cloud is the smallest convex set that contains it. The volume of the smallest convex set was used as the volume of the corresponding point cloud. Total surface area in T13 was computed through the alpha shape algorithm (Colaço et al., 2017; Di Gennaro and Matese, 2020).

Table S1. Detailed definition and format of stem structural metrics.

| Attribute     | No. | Definition                                      | Format                                                                            |
|---------------|-----|-------------------------------------------------|-----------------------------------------------------------------------------------|
| Stem diameter | S1  | S1=DBH;                                         | $S1 = DBH$                                                                        |
|               | S2  | S2=DBH/TH;                                      | $S2 = DBH/TH$                                                                     |
|               | S3  | S3=DBH/tree volume;                             | $S3 = DBH/TV$                                                                     |
|               | S4  | S4=DBH/minimum stem radius                      | $S4 = DBH/R_{st}$                                                                 |
| Stem shape    | S5  | Stem radial irregularity                        | $S5 = \sqrt{\sum_{i=1}^{p_{sri}} (\Delta s_i - \overline{\Delta s})^2 / p_{sri}}$ |
|               | S6  | Stem taper                                      | $S6 = (R_{sb} - R_{st})/S7$                                                       |
| Stem length   | S7  | Stem length                                     | $S7 = SL$                                                                         |
|               | S8  | Stem length / tree height                       | $S8 = S7/TH$                                                                      |
| Stem angle    | S9  | Angle between stem direction vector and axis x  | $S9=A_x$                                                                          |
|               | S10 | Angle between stem direction vector and axis y  | $S10=A_y$                                                                         |
|               | S11 | Angle between stem direction vector and axis z. | $S11=A_z$                                                                         |
| Stem volume   | S12 | Stem volume                                     | $S12=\sum_{i=1}^s SV_i$                                                           |

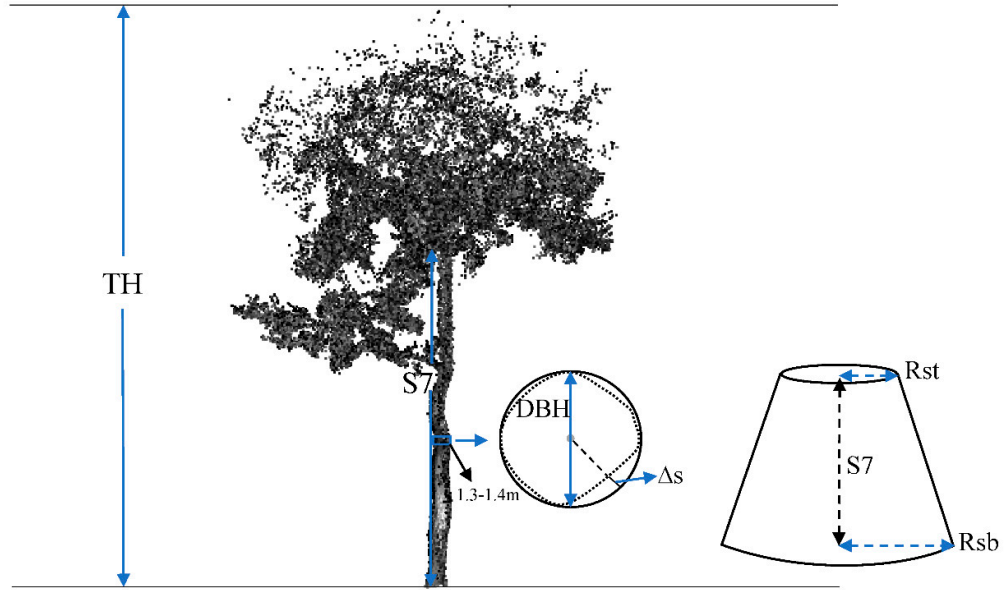

Figure S1. Illustration of stem metric derivation.

Table S2. Detailed definition and format of branch structural metrics.

| Attribute      | No. | Structural metrics                                         | Format                                                                                                                                |
|----------------|-----|------------------------------------------------------------|---------------------------------------------------------------------------------------------------------------------------------------|
| Branch angle   | B1  | Average count of 1st branches in 8 azimuths                | $B1 = \sum_{i=1}^8 Nb1_i / 8$                                                                                                         |
|                | B2  | Median of 1st branch angle                                 | $B2 = \begin{cases} \left( \frac{A_n + A_{n+1}}{2} \right) / 2, n \text{ is even} \\ A_{\frac{n+1}{2}}, n \text{ is odd} \end{cases}$ |
|                | B3  | Sum of 1st branch angle                                    | $B3 = \sum_{i=1}^n A_i$                                                                                                               |
|                | B4  | Average of 1st branch angle                                | $B4 = \frac{B3}{n}$                                                                                                                   |
|                | B5  | Median 1st branch angle/median 2nd branch angle            | $B5 = f(A_i, n) / f(A_{2i}, n_2)$                                                                                                     |
|                | B6  | Standard deviation of 1st branch angle                     | $B6 = \sqrt{\frac{\sum_{i=1}^n (A_i - \bar{A})^2}{n-1}}$                                                                              |
| Branch length  | B7  | Sum of 1st branch length                                   | $B7 = \sum_{i=1}^n B1_{li}$                                                                                                           |
|                | B8  | Average of 1st branch length                               | $B8 = \frac{B7}{n}$                                                                                                                   |
|                | B9  | Ratio of average of 1st branch length to tree height       | $B9 = \frac{B8}{TH}$                                                                                                                  |
|                | B10 | Ratio of average of 1st branch length to DBH               | $B10 = \frac{B8}{DBH}$                                                                                                                |
|                | B11 | Overall branch length / overall branch volume              | $B11 = \frac{BL}{BV}$                                                                                                                 |
|                | B12 | Average length of top 10 longest branches                  | $B12 = \frac{\sum_{i=1}^{10} B1_{li}}{n}$                                                                                             |
| Branch radius  | B13 | Average of 1st branch radius                               | $B13 = \sum_{i=1}^n Rb1_i / n$                                                                                                        |
|                | B14 | B13/tree height                                            | $B14 = B13 / TH$                                                                                                                      |
|                | B15 | Average radius of top 10 largest branches                  | $B15 = \sum_{i=1}^{10} Rb1_i / 10$                                                                                                    |
| Branch cluster | B16 | Average vertical distance between 1st branches             | $B16 = \sum_{i=1, j=1}^{n-1} d_{bi, bj} / n - 1$                                                                                      |
|                | B17 | B16/DBH                                                    | $B17 = B16 / DBH$                                                                                                                     |
|                | B18 | Branch volume below 55% of the tree                        | $B18 = BV_{0-55}$                                                                                                                     |
|                | B19 | Average number of 1st branch with the 40cm height interval | $B19 = \frac{1}{hl} \sum_{i=1}^{hl} B_{1\_hl_i}$                                                                                      |

Where Nb1 is the number of 1st branch in an azimuth,  $A_i$  is the angle between 1st branch and trunk,  $\bar{A}$  is the average of all  $A_i$ , n is the number of 1st branches,  $n_2$  is the number of 2nd branches,  $A_{2i}$  is the angle between the 1st and 2nd branches,  $B1_i$  is the length of 1st branch, BL is the overall branch length, BV is overall branch volume, Rb1 is 1st branch radius, TH is tree height,  $d_{bi, bj}$  is the vertical distance between 1st branch  $bi$  and  $bj$ ,  $BV_{0-55}$  is the branch volume below 55% of the tree,  $hl$  is the number of layers with height of 0.4m,  $B_{1\_hl_i}$  is the number of 1st branches in the height layer  $i$ . The median value in B2 and B5 was calculated by  $f(A, n)$ , Before input into the function, A values were sorted from smallest to largest, n is the number of variables in A. When n is even, the output of  $f(A, n)$  is the average

of  $\frac{n}{2}$ th and  $\frac{n+1}{2}$ th A values. When n is odd, the output of  $f(A, n)$  is the  $\frac{n+1}{2}$ th A value.

$$f(A_i, n) = \begin{cases} \frac{(A_{\frac{n}{2}} + A_{\frac{n+1}{2}})}{2}, & n \text{ is even} \\ A_{\frac{n+1}{2}}, & n \text{ is odd} \end{cases}$$

Table S3. Detailed definition and format of entire tree structural metrics.

| Attribute           | No. | Definition                                                                               | Format                                        |
|---------------------|-----|------------------------------------------------------------------------------------------|-----------------------------------------------|
| Height metrics      | T1  | Tree height                                                                              | $T1 = H_t - H_e$                              |
|                     | T2  | Mean height of all G0.1 / tree height                                                    | $T2 = (\frac{1}{g} \sum_{i=1}^g H_{gi}) / TH$ |
|                     | T3  | Mean height of all G0.1                                                                  | $T3 = \frac{1}{g} \sum_{i=1}^g H_{gi}$        |
| Cover metrics       | T4  | Coverage area within 30% of tree height / crown coverage area                            | $T4 = C_{30\%} / C_{crown}$                   |
| Volume distribution | T5  | Number of stem G0.1 / all G0.1                                                           | $T5 = g_s / g$                                |
|                     | T6  | Tree volume                                                                              | $T6 = cov(p)$                                 |
|                     | T7  | Tree volume within 80-90% of the tree height / tree volume within 10% of the tree height | $T7 = cov(p)_{80-90} / cov(p)_{0-10}$         |
|                     | T8  | Relative cylinder volume below 55% of tree height;                                       | $T8 = cov(p)_{0-55}$                          |
|                     | T9  | Total length of all cylinders / total tree volume.                                       | $T9 = L_{cyl} / cov(p)$                       |
|                     | T10 | Tree volume / crown cover area;                                                          | $T10 = cov(p) / C_{crown}$                    |
|                     | T11 | Tree volume / tree height;                                                               | $T11 = cov(p) / TH$                           |
|                     | T12 | Tree volume / crown diameter                                                             | $T12 = cov(p) / d_{crown}$                    |
| Surface             | T13 | Total surface area of entire tree                                                        | $T13 = \alpha(p)$                             |

Where  $H_t$  is the highest height of a tree,  $H_e$  is the lowest height of a tree,  $g$  is number of grids,  $H_{gi}$  is height of the center of grid  $i$ ,  $C_{30\%}$  is the coverage area with 30% of tree height,  $C_{crown}$  is crown coverage area,  $g_s$  is the number of stem grid,  $cov$  is the alpha algorithm used for volume calculation,  $p$  is tree points.  $cov(p)_{80-90}$  means tree volume within 80-90% of the tree height,  $cov(p)_{0-10}$  means tree volume within 10% of the tree height,  $d_{crown}$  is crown diameter,  $\alpha$  is the convex hull algorithm for surface calculation, G0.1 means grid representing a tree with edge length of 0.1m.

The crown bottom was defined as the lower third of the crown. The highest crown bottom and lowest crown bottom were the highest height and lowest height of crown bottom points

respectively as shown in Figure S2. Along the stem, the height that leaves appeared or the branch appeared was defined as crown start height. Height of max crown spread ( $H_{maxc}$ ) was the height that crown have maximum spread. The largest crown length and the smallest crown length were the vertical distance from treetop to the lowest crown bottom and the highest crown bottom respectively.  $CD_{xy}$  was the maximum distance between projected crown points (project crown points on the x-y plane).  $CD_{yz}$  and  $CD_{xz}$  were the maximum distance between crown points that projected on the y-z and the x-z plane respectively.  $CCD$  was the maximum distance of projected crown points at the opposite direction of crown diameter. Crown radius ( $Cr$ ) was the half of  $CD_{xy}$ . Crown area  $A_{xy}$  was calculated by convex hull algorithm. The crown points were firstly projected on the x-y plane, then the projection area was calculated using convex hull algorithm. Crown vertical projecting area  $A_{vc}$  was the average of area that projected on the y-z plane and the x-z plane. Crown equivalent diameter ( $Cer$ ) was the diameter of the equivalent crown whose area equals tree crown as shown in Figure S3. Diameter of the minimum circle of crown ( $CD_{mincir}$ ) was the diameter of minimum circumcircle of crown. Crown volume ( $V_c$ ) was calculated through convex hull algorithm. To derive the shape signature index  $SS_c$ , crown surface points were divided into several layers with height interval of 0.1m from crown top to crown bottom. The point number within each layer and layer number can be used to calculate  $SS_c$ .

To evaluate the detailed crown shape, we vertically divided crown into 8 segments as illustrated in Figure S3. In these segments, the ratio between the highest crown top and the lowest crown top was defined as crown top evenness and the ratio between the highest crown bottom and the lowest crown bottom was defined as crown bottom evenness. The points in each segment were projected to the central vertical grided profile with the edge length of 1m referring to Lin and Hyypä (2016). The difference between profiles were

calculated through diff function in R and the similarity between profiles were calculated through Cor function. Coefficient variation of crown ( $C_{cv}$ ) demonstrated the height dispersion within a crown scale (Liu and Wu, 2018).

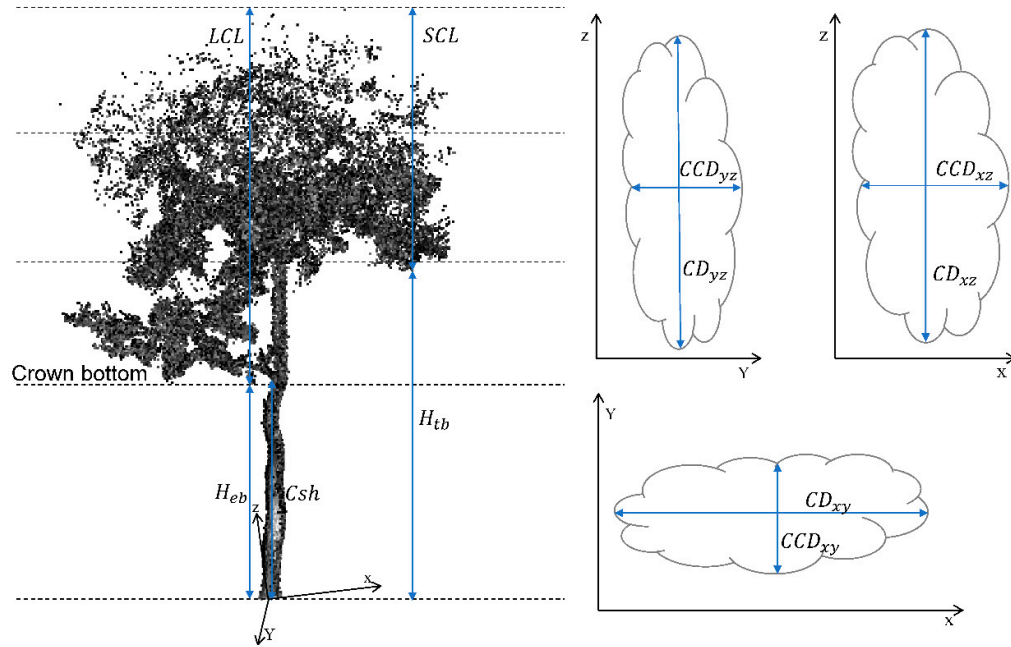

Figure S2. Illustration of crown metrics.

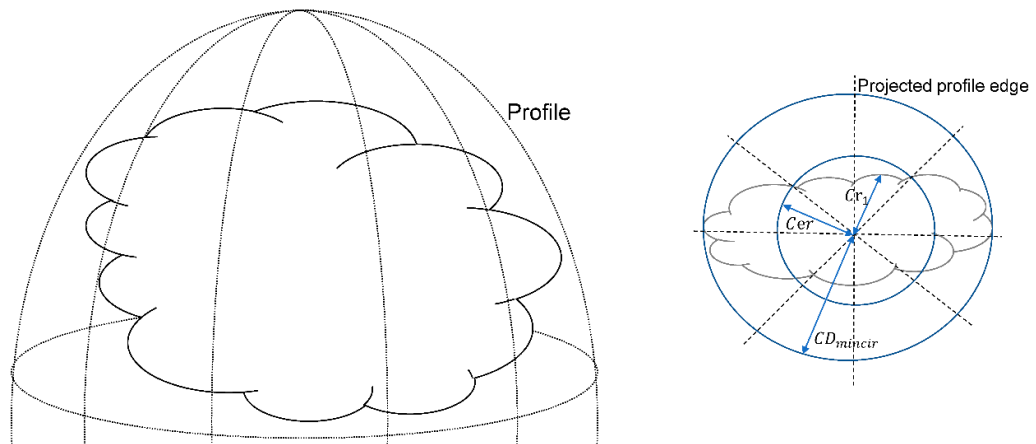

Figure S3. Illustration of crown profile and relevant metrics.

Table S4. Detailed definition and format of crown structural metrics.

| Attribute      | No. | Definition                                                                                                                 | Format                                                               |
|----------------|-----|----------------------------------------------------------------------------------------------------------------------------|----------------------------------------------------------------------|
| Crown height   | C1  | The highest crown bottom                                                                                                   | $C1 = H_{tb}$                                                        |
|                | C2  | The lowest crown bottom                                                                                                    | $C2 = H_{eb}$                                                        |
|                | C3  | Crown start height                                                                                                         | $C3 = Csh$                                                           |
|                | C4  | Ratio between crown start height and tree height                                                                           | $C4 = C3/TH$                                                         |
| Crown length   | C5  | Largest Crown length (LCL)                                                                                                 | $C5 = LCL$                                                           |
|                | C6  | Ratio between longest crown length and smallest crown length (SCL)                                                         | $C6 = LCL/SCL$                                                       |
|                | C7  | Average crown length                                                                                                       | $C7 = (LCL + SCL)/2$                                                 |
|                | C8  | Ratio between LCL and crown diameter that derived from projected crown points on the x-y plane                             | $C8 = LCL/CD_{xy}$                                                   |
|                | C9  | Ratio between LCL and tree height                                                                                          | $C9 = LCL/TH$                                                        |
| Crown diameter | C10 | Ratio between $CD_{xy}$ and tree height                                                                                    | $C10 = CD_{xy}/TH$                                                   |
|                | C11 | Ratio between $CD_{xy}$ and SCL                                                                                            | $C11 = CD_{xy}/SCL$                                                  |
|                | C12 | Ratio between $CD_{xy}$ and crown cross diameter $CCD_{xy}$ that derived from projected crown points on the x-y plane      | $C12 = CD_{xy}/CCD_{xy}$                                             |
|                | C13 | Crown diameter $CD_{xy}$ that derived from projected crown points on the x-y plane                                         | $C13 = CD_{xy}$                                                      |
|                | C14 | crown cross diameter $CCD_{xy}$ that derived from projected crown points on the x-y plane                                  | $C14 = CCD_{xy}$                                                     |
|                | C15 | Ratio between crown diameter and crown cross diameter derived from projected crown points on the y-z plane                 | $C15 = CD_{yz}/CCD_{yz}$                                             |
|                | C16 | Ratio between crown diameter and crown cross diameter derived from projected crown points on the x-z plane                 | $C16 = CD_{xz}/CCD_{xz}$                                             |
|                | C17 | Ratio between the radius of equivalent centers for the grids within the profiles and crown radius (average for 8 profiles) | $C17 = \sum_{i=1}^8 (\sum_{j=1}^{n_{cg}} R_{G_j}/n) / (8 \times Cr)$ |
|                | C18 | SD of ratio between the radius of equivalent centers for the grids within                                                  | $C18 = std((\sum_{j=1}^n R_{G_j}/n)/Cr)_i \mid i = 1, \dots, 8)$     |

| Attribute                 | No. | Definition                                                                                                                             | Format                                                                        |
|---------------------------|-----|----------------------------------------------------------------------------------------------------------------------------------------|-------------------------------------------------------------------------------|
|                           |     | the profiles and crown radii                                                                                                           |                                                                               |
|                           | C19 | Semi-axis lengths of paraboloid fitted to tree crown at axis X.                                                                        | $C19 = l_x/2$                                                                 |
|                           | C20 | Semi-axis lengths of paraboloid fitted to tree crown at axis Y                                                                         | $C20 = l_y/2$                                                                 |
|                           | C21 | Semi-axis lengths of paraboloid fitted to tree crown at axis Z                                                                         | $C21 = l_z/2$                                                                 |
|                           | C22 | Crown equivalent diameter                                                                                                              | $C22 = C_{er}$                                                                |
|                           | C23 | Diameter of the minimum circle of crown                                                                                                | $C23 = CD_{mincir}$                                                           |
| Crown area                | C24 | Ratio between the height of max crown spread and tree height                                                                           | $C24 = H_{maxc}/TH$                                                           |
|                           | C25 | Ratio between the height of max crown spread and LCL                                                                                   | $C25 = H_{maxc}/LCL$                                                          |
|                           | C26 | Ratio between crown area $A_{xy}$ and tree height                                                                                      | $C26 = A_{xy}/TH$                                                             |
|                           | C27 | Ratio between crown area and crown vertical projecting area                                                                            | $C27 = A_{xy}/((A_{xz} + A_{yz})/2)$                                          |
| Crown height distribution | C28 | Ratio between the height of the equivalent centers for the grids within each profile and LCL (average for 8 profiles)                  | $C28$<br>$= \sum_{i=1}^8 (\sum_{j=1}^n H_{G_j}/n)/8 \times LCL$               |
|                           | C29 | Ratio between average height of all crown grids with profiles and LCL                                                                  | $C29 = (\frac{1}{n} \sum_{i=1}^n H_{G_i})/LCL$                                |
|                           | C30 | Ratio between C34 and C18                                                                                                              | $C30 = C34/C18$                                                               |
| Crown shape               | C31 | Ratio between overall similarity between two opposite vertical profiles and overall similarity between two adjacent vertical profiles; | $C31 = \frac{\sum_{i=1}^4 Cor(S_i, S_{i+4})}{\sum_{i=1}^8 Cor(S_i, S_{i+1})}$ |
|                           | C32 | Ratio between alpha volume and convex hull volume of crown;                                                                            | $C32 = V_\alpha/V_{cov}$                                                      |
|                           | C33 | Crown top evenness;                                                                                                                    | $C33 = H_{tth}/H_{teh}$                                                       |
|                           | C34 | SD of C28 for all of the 8 vertical profiles;                                                                                          | $C34$<br>$= std(((\sum_{j=1}^n H_{G_j}/n)/LCL)_i   i, \dots)$                 |



| Attribute                       | No. | Definition                                                                                                                                       | Format                                                                                                                                           |
|---------------------------------|-----|--------------------------------------------------------------------------------------------------------------------------------------------------|--------------------------------------------------------------------------------------------------------------------------------------------------|
|                                 | C35 | Crown bottom evenness                                                                                                                            | $C35 = H_{bth}/H_{beh}$                                                                                                                          |
| Crown<br>volume                 | C36 | Crown volume;                                                                                                                                    | $C36 = V_{\alpha}$                                                                                                                               |
|                                 | C37 | Ratio between crown volume and crown area                                                                                                        | $C37 = V_{\alpha}/A_{xy}$                                                                                                                        |
|                                 | C38 | Ratio between crown volume and number of points in a crown                                                                                       | $C38 = V_{\alpha}/n_{cp}$                                                                                                                        |
| Crown<br>volume<br>distribution | C39 | Ratio between convex hull volume of crown grids with maximum point density and corresponding grid volume                                         | $C39 = V_{CG_{maxden}}/V_{G_{maxden}}$                                                                                                           |
|                                 | C40 | Standard deviation of the number of the grids filled by laser points for all of the V crown layers                                               | $C40 = std(N_{G_i} i = 1, \dots, v)$                                                                                                             |
|                                 | C41 | Sum of the difference between the 8 adjacent profile/differences between all CG0.1                                                               | $C41 = \frac{\sum_{i=1}^8 diff(S_i, S_{i+4})}{\sum diff(PG_i, PG_j)}$                                                                            |
| Crown<br>irregularity           | C42 | Coefficient variation of crown;                                                                                                                  | $C42$<br>$= \sqrt{\frac{1}{n_{cp}} \sum_{i=0}^{n_{cp}} (H_i - \frac{1}{n_{cp}} \sum_{i=1}^{n_{cp}} H_i)^2} / \frac{1}{n_c}$                      |
|                                 | C43 | Average ratio between the total area of voxel one-side covers and the area of the 2D convex hull of the crown from two perpendicular side views. | $C43$<br>$= \frac{1}{2} \times \left( \frac{\sum(n_{G_{xz}} \times A_G)}{A_{CV}^{xz}} + \frac{\sum(n_{G_{yz}} \times A_G)}{A_{CV}^{yz}} \right)$ |
|                                 | C44 | Residual sum of squared errors of gaussian fitting in crown ellipsoid modeling;                                                                  | $C44 = \delta   \exp(-\frac{(x-u)^2}{2\delta^2})$                                                                                                |
|                                 | C45 | Shape signature index;                                                                                                                           | $C45 = \sum_{i=1}^m (i \times l_i) / \sum_{i=1}^m l_i$                                                                                           |

Where  $n_{cg}$  is the number of crown grids,  $R_{G_j}$  is the radius of ith grid,  $l_x, l_y, l_z$  are the length of axiz x, y, z of fitted paraboloid respectively,  $H_{maxc}$  is the height of max crown spread,  $H_{G_j}$  is the height of equivalent center of grid j,  $S$  is the segment,  $V_{\alpha}$  is crown volumn calculated by alpha shape algorithm,  $V_{cov}$  is crown volumn calculated by convex hull algorithm,  $H_{tth}$  is height of highest crown top,  $H_{teh}$  is height of lowest crown top,  $H_{bth}$  is height of highest crown bottom,  $H_{beh}$  is height of lowest crown bottom,  $n_{cp}$  is the number of crown points,  $V_{CG_{maxden}}$  is the point volume of grid that have maximum

point density,  $V_{G_{maxden}}$  is the volume of grid that have maximum point density,  $N_{G_i}$  is the number of grids in layer crown layer i,  $PG_i$  is the grid on profile,  $H_i$  is the height of point i,  $A_G$  is the side area of each crown grid,  $n_{G_{XZ}}$ ,  $n_{G_{YZ}}$  are the number of crown grids in the x-z and y-z projection plane,  $A_{CV}^{XZ}$ ,  $A_{CV}^{YZ}$  is the area of crown grids in the x-z and y-z projection plane,  $m$  is the number of layers,  $l_i$  is the number of points in layer i, CG0.1 means grid representing a tree with edge length of 0.1m.

## References

- Colaço A F, Trevisan RG, Molin JP, Rosell-Polo JR (2017) A method to obtain orange crop geometry information using a mobile terrestrial laser scanner and 3D modeling. *Remote Sensing* 9(8), 763.
- Cupec R, Vidović I, Filko D, Đurović P (2020) Object recognition based on convex hull alignment. *Pattern recognition* 102, 107199.
- Di Gennaro SF, Matese A (2020) Evaluation of novel precision viticulture tool for canopy biomass estimation and missing plant detection based on 2.5 D and 3D approaches using RGB images acquired by UAV platform. *Plant Methods* 16(1), 1-12.
- Lin Y, Hyypä J (2016) A comprehensive but efficient framework of proposing and validating feature parameters from airborne LiDAR data for tree species classification. *International Journal of Applied Earth Observation and Geoinformation* 46, 45-55.
- Liu H, Wu C (2018) Incorporating crown shape information for identifying ash tree species. *Photogrammetric Engineering and Remote Sensing* 84(8), 495-503.
